# Supplementary material for: Measurement report: The influence of particle number size distribution and hygroscopicity on the microphysical properties of cloud droplets at a mountain site
Source: Copernicus journal article supplement (doi:10.5194/egusphere-2024-2850), 2024-10-15
Supplement: Supplementary file 1 [file egusphere-2024-2850-supplement.pdf]

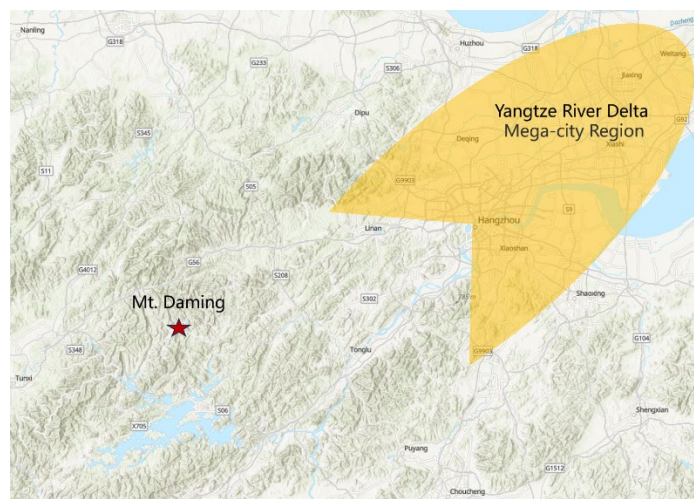

Fig. S1. The location of the observatory

### Back-trajectory calculation

To elucidate the air masses origin during the cloud formation under polluted conditions, the 72-hour backward trajectories arriving at Mt. Daming site were calculated for a cloud process on May 8, terminating at the height of 2000 m above ground level. The back-trajectories are calculated by applying the HYSPLIT 4 model (Hybrid Single Particle Lagrangian Integrated Trajectory) and using the NCEP GDAS (Global Data Assimilation System) data with a spatial resolution of  $1^\circ \times 1^\circ$  (Draxler and Hess, 1998).

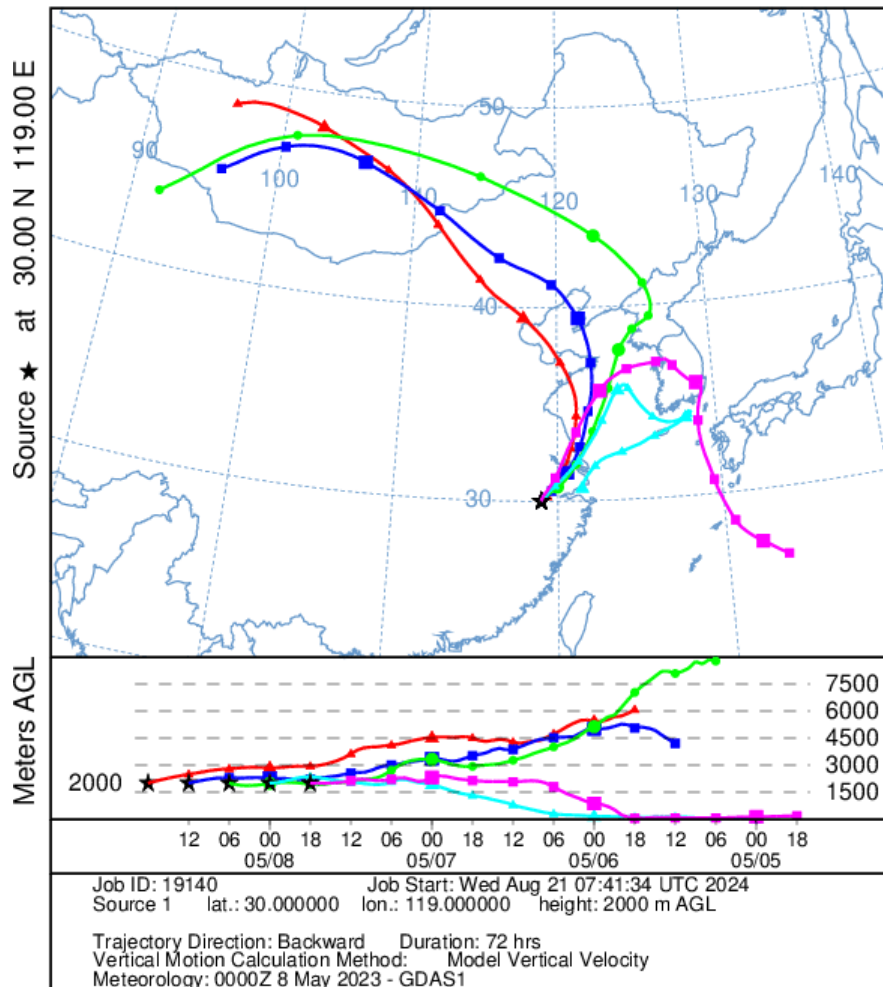

Fig. S2 The back trajectories arriving at Mt. Daming on May 8<sup>th</sup>, with the terminal height of 2000 m above ground level.

Draxler, R.R., Hess, G.D., 1998. An overview of the HYSPLIT\_4 modelling system of trajectories, dispersion, and deposition. *Aust. Meteor. Mag.*, 47, 295-308.
